# Supplementary material
Source: PubMed Central journal article supplement (PMC3548265)
Supplement: ejhg2012148x1.pdf [file ejhg2012148x1.pdf]

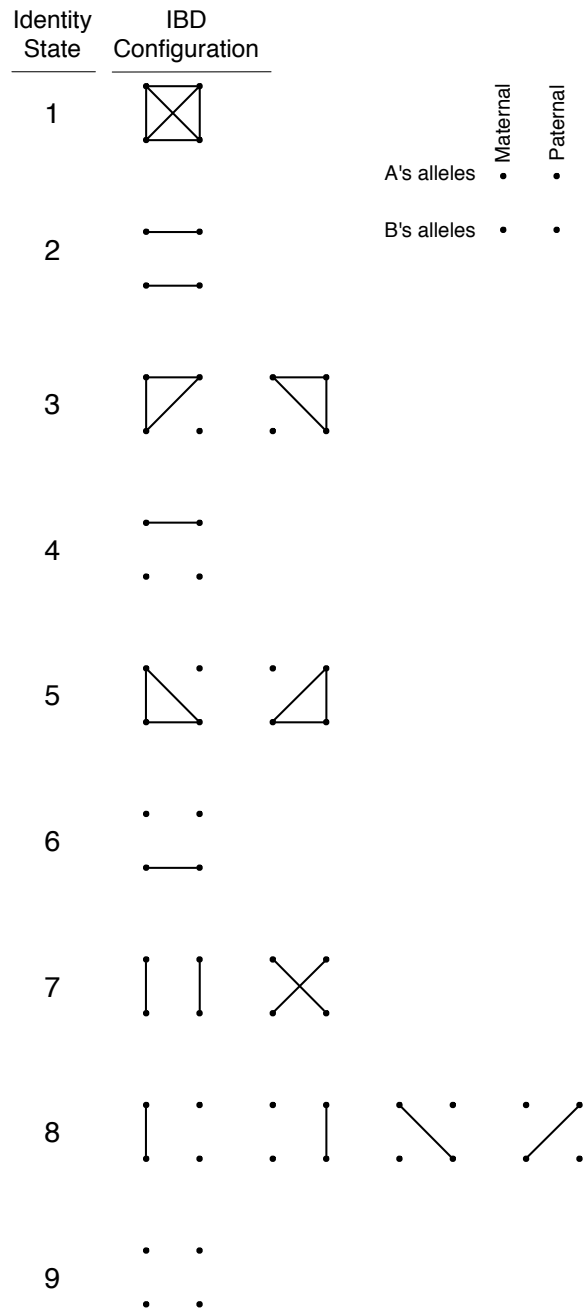

Figure S1. The condensed identity states. The 15 detailed identity states grouped into the nine condensed identity states. Each dot represents an allele and a line connecting dots indicates those alleles are IBD.

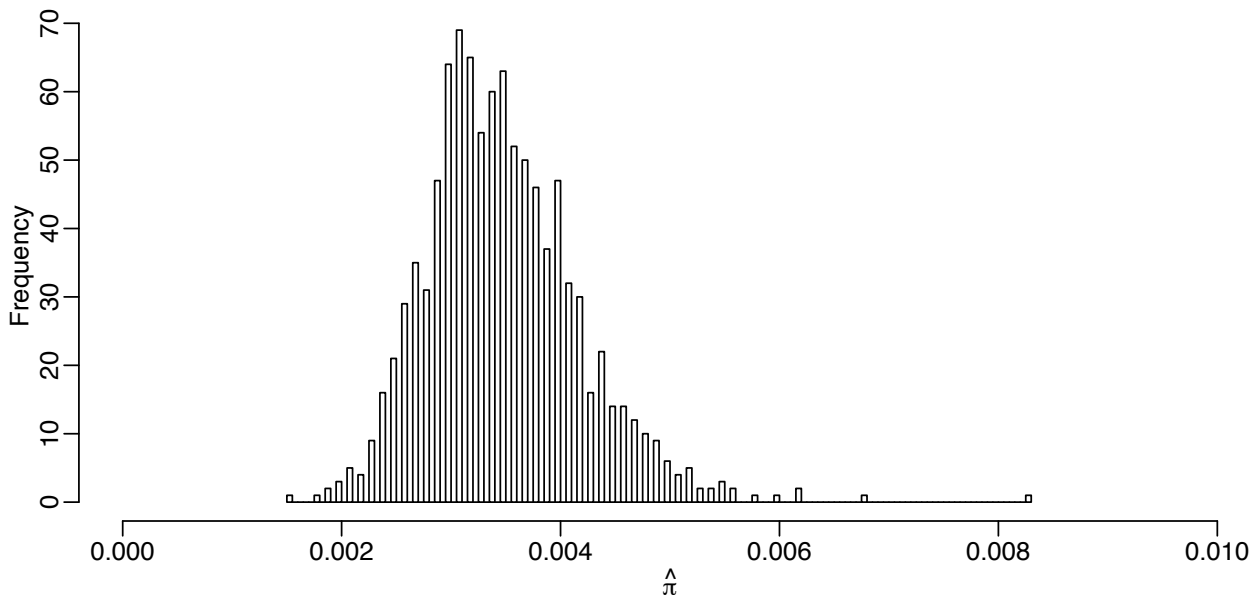

Figure S2. Distribution of  $\hat{\pi}$  in simulated unrelated YRI pairs.

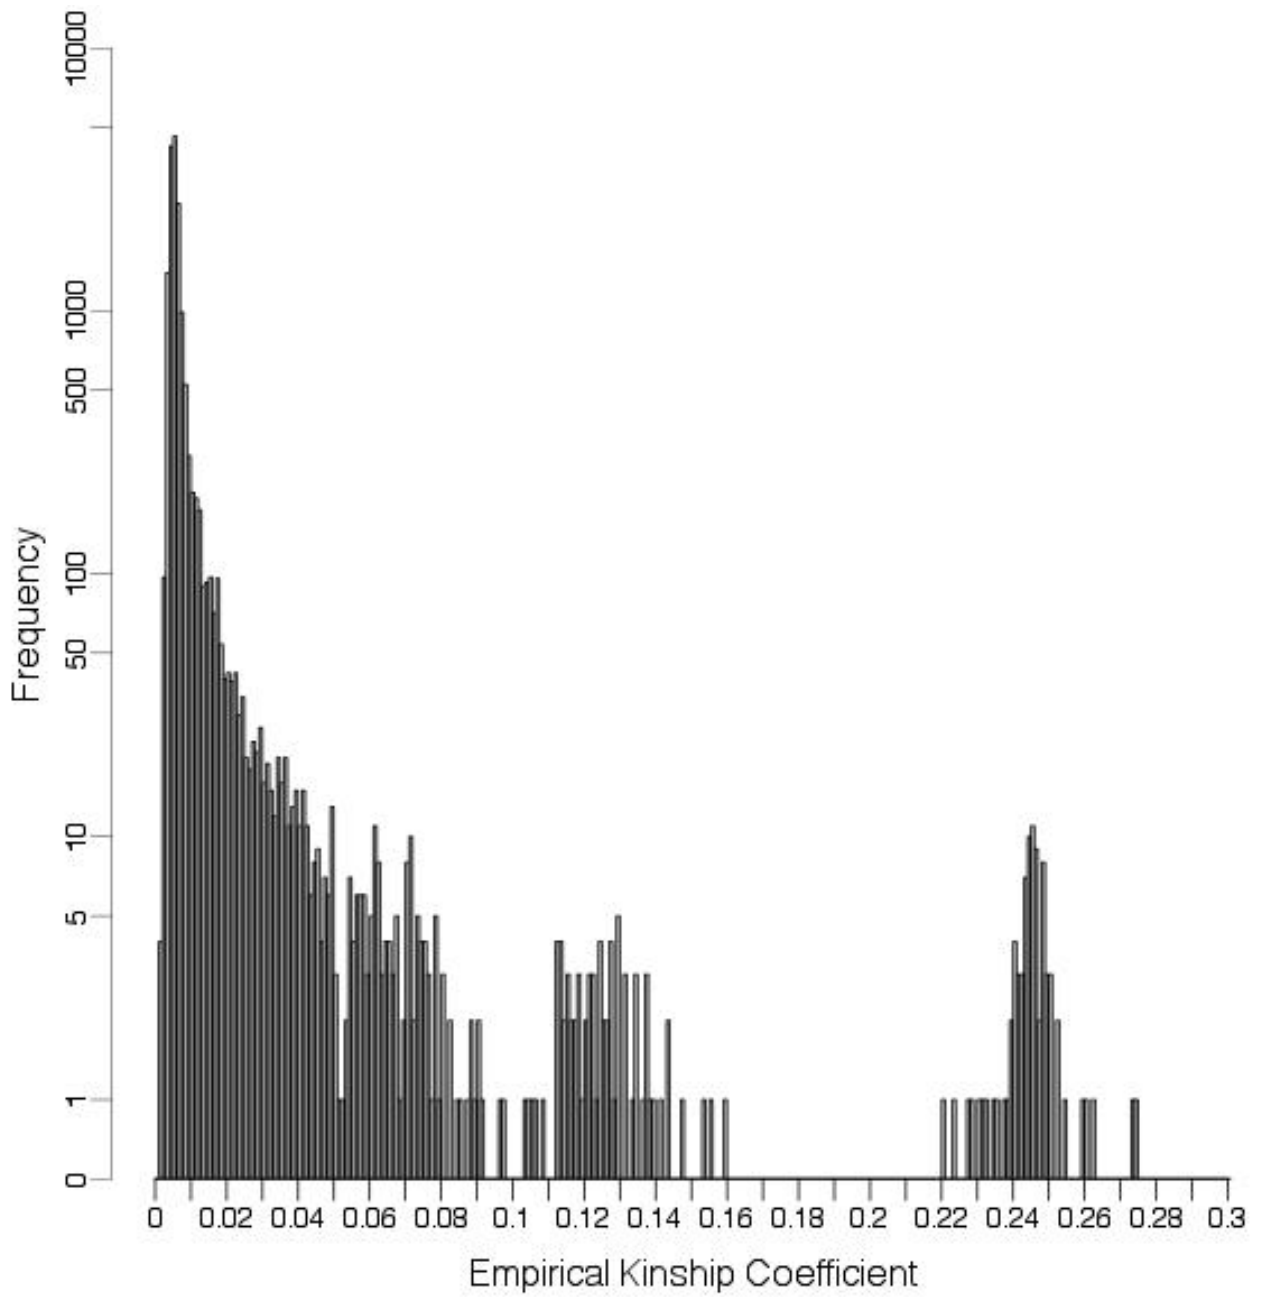

Figure S3. Distribution of  $\hat{\pi}$  across all MKK pairs.

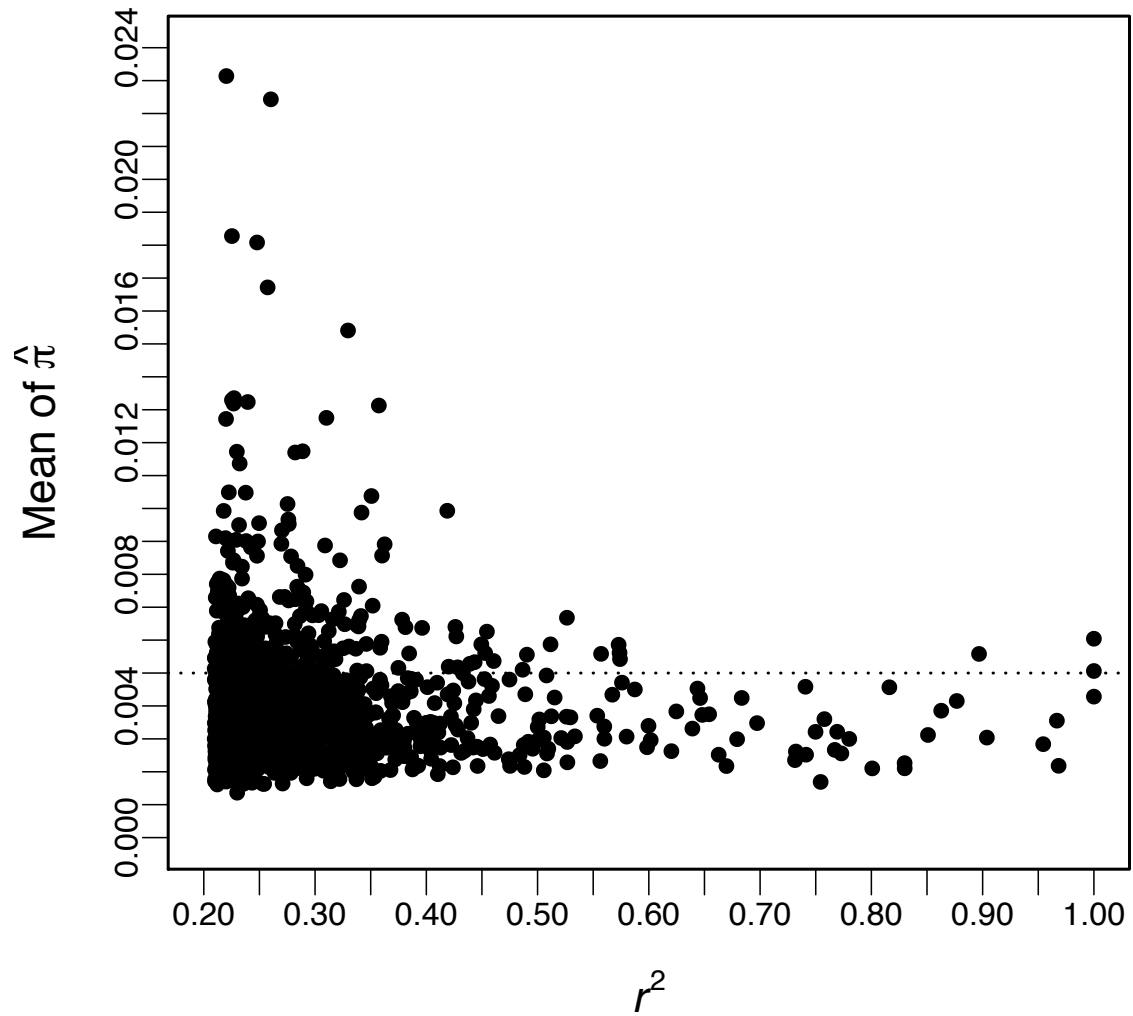

Figure S4. The mean, across all unrelated pairs, of  $\hat{\pi}_i$  for a SNP in genomic regions with high LD (measured by  $r^2$ ). The dotted line is the genomewide average of  $\hat{\pi}_i$  across all unrelated pairs.

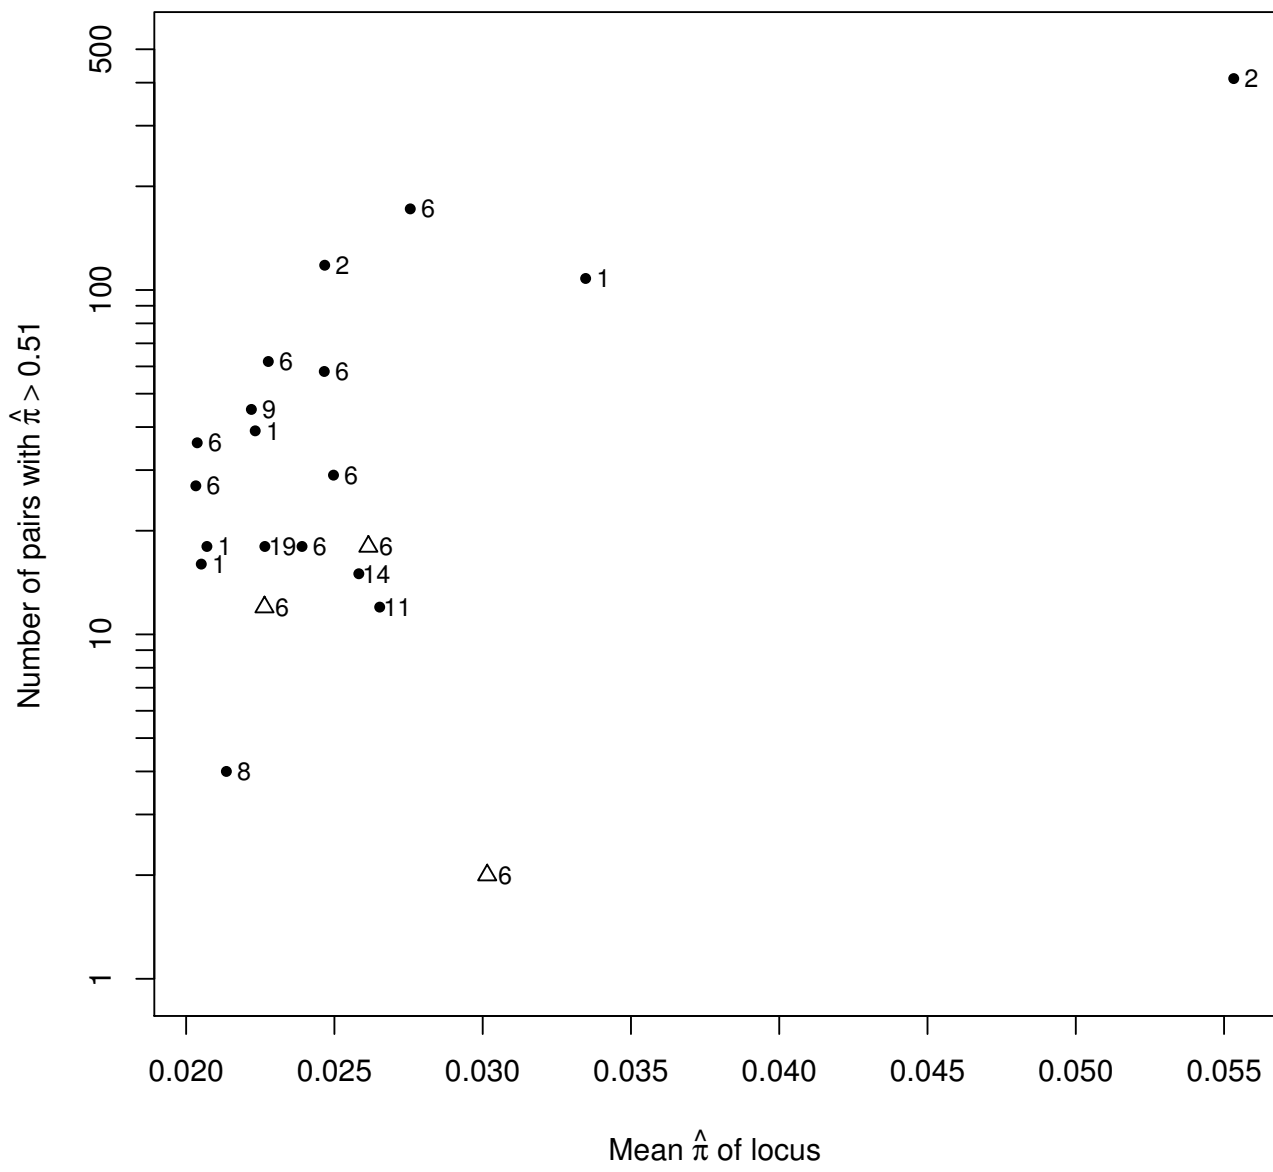

Figure S5. Number of pairs with  $\hat{\pi}_i > 0.51$ . For each locus with mean  $\hat{\pi}_i > 0.02$ , the number of pairs for which  $\hat{\pi}_i$  was estimated as  $> 0.51$ . Next to each point is the chromosome on which that locus is located. The open triangles represent loci in the HLA region. Note that the vertical axis is on the log scale.

Table  $S_1$ . The Individuals in different MKK panels. The panels are labeled with the letter “M” followed by a count of the number of individuals in the panel. All pairs within a panel have  $\hat{\pi} < \Pi_p$  where  $\Pi_p$  is a threshold for that panel. We define panels as all MKK individuals minus excluded individuals. Excluded individuals for a panel are those listed in the table for that panel as well as excluded individuals for panels on previous rows.

| Panel            | $\Pi_p$ | Excluded Individuals |         |         |         |         |         |
|------------------|---------|----------------------|---------|---------|---------|---------|---------|
| M183             | 0.50    | NA21737              |         |         |         |         |         |
| M136             | 0.22    | NA21475              | NA21384 | NA21522 | NA21402 | NA21314 | NA21718 |
|                  |         | NA21648              | NA21636 | NA21608 | NA21601 | NA21527 | NA21525 |
|                  |         | NA21514              | NA21493 | NA21490 | NA21487 | NA21480 | NA21455 |
|                  |         | NA21442              | NA21439 | NA21425 | NA21401 | NA21389 | NA21383 |
|                  |         | NA21366              | NA21361 | NA21317 | NA21313 | NA21309 | NA21302 |
|                  |         | NA21683              | NA21678 | NA21613 | NA21596 | NA21587 | NA21577 |
|                  |         | NA21575              | NA21523 | NA21509 | NA21477 | NA21434 | NA21415 |
|                  |         | NA21405              | NA21404 | NA21386 | NA21344 | NA21318 |         |
| M107             | 0.10    | NA21617              | NA21494 | NA21453 | NA21320 | NA21634 | NA21520 |
|                  |         | NA21488              | NA21421 | NA21414 | NA21370 | NA21308 | NA21825 |
|                  |         | NA21741              | NA21733 | NA21719 | NA21685 | NA21635 | NA21616 |
|                  |         | NA21615              | NA21599 | NA21583 | NA21519 | NA21450 | NA21448 |
|                  |         | NA21447              | NA21438 | NA21387 | NA21312 | NA21304 |         |
| M87              | 0.05    | NA21351              | NA21614 | NA21513 | NA21420 | NA21357 | NA21740 |
|                  |         | NA21650              | NA21528 | NA21473 | NA21435 | NA21367 | NA21300 |
|                  |         | NA21723              | NA21631 | NA21597 | NA21526 | NA21521 | NA21485 |
|                  |         | NA21423              | NA21352 |         |         |         |         |
| M36 <sup>a</sup> | 0.01    | NA21717              | NA21424 | NA21365 | NA21486 | NA21390 | NA21722 |
|                  |         | NA21576              | NA21303 | NA21512 | NA21339 | NA21784 | NA21391 |
|                  |         | NA21316              | NA21457 | NA21409 | NA21382 | NA21619 | NA21578 |
|                  |         | NA21524              | NA21515 | NA21378 | NA21400 | NA21362 | NA21716 |
|                  |         | NA21647              | NA21620 | NA21479 | NA21417 | NA21408 | NA21388 |
|                  |         | NA21517              | NA21489 | NA21359 | NA21297 | NA21682 | NA21580 |
|                  |         | NA21454              | NA21371 | NA21364 | NA21686 | NA21622 | NA21611 |
|                  |         | NA21582              | NA21529 | NA21510 | NA21491 | NA21451 | NA21440 |
|                  |         | NA21418              | NA21381 | NA21356 |         |         |         |

<sup>a</sup> The individuals included in M36 are: NA21826, NA21776, NA21770, NA21769, NA21768, NA21739, NA21738, NA21693, NA21689, NA21632, NA21600, NA21584, NA21574, NA21573, NA21478, NA21476, NA21441, NA21436, NA21410, NA21403, NA21399, NA21385, NA21379, NA21368, NA21363, NA21360, NA21355, NA21353, NA21341, NA21336, NA21333, NA21311, NA21307, NA21301, NA21298, NA21295.

Table  $S_2$ . Unrelated pairs with IBD segments  $\geq 30$  cM

| Individual 1 | Individual 2 | Chr   | Length (cM) | Length (Mb) | # of SNPs | $\hat{\pi}$ |
|--------------|--------------|-------|-------------|-------------|-----------|-------------|
| NA21360      | NA21379      | chr1  | 37.16       | 19.900      | 8890      | 0.0064      |
| NA21601      | NA21423      | chr2  | 30.08       | 24.750      | 12215     | 0.0093      |
| NA21309      | NA21435      | chr2  | 35.78       | 33.960      | 17436     | 0.0091      |
| NA21769      | NA21577      | chr3  | 55.27       | 65.000      | 24595     | 0.0066      |
| NA21420      | NA21424      | chr4  | 35.62       | 27.850      | 11803     | 0.0091      |
| NA21361      | NA21717      | chr5  | 36.42       | 19.020      | 9364      | 0.009       |
| NA21351      | NA21339      | chr5  | 33.50       | 27.780      | 12084     | 0.0083      |
| NA21784      | NA21480      | chr6  | 31.09       | 22.900      | 11412     | 0.0094      |
| NA21619      | NA21682      | chr6  | 34.56       | 16.690      | 10228     | 0.0088      |
| NA21316      | NA21366      | chr7  | 30.33       | 17.350      | 9013      | 0.0078      |
| NA21601      | NA21408      | chr8  | 31.24       | 14.960      | 11239     | 0.008       |
| NA21410      | NA21441      | chr9  | 34.25       | 24.750      | 13250     | 0.0089      |
| NA21359      | NA21383      | chr10 | 34.92       | 15.260      | 10216     | 0.0069      |
| NA21361      | NA21382      | chr10 | 35.98       | 15.250      | 10337     | 0.009       |
| NA21487      | NA21417      | chr10 | 33.94       | 32.470      | 15374     | 0.0094      |
| NA21509      | NA21716      | chr11 | 38.04       | 47.770      | 17949     | 0.0087      |
| NA21529      | NA21522      | chr12 | 40.39       | 17.700      | 9762      | 0.0088      |
| NA21298      | NA21425      | chr13 | 30.73       | 34.020      | 14991     | 0.0083      |
| NA21383      | NA21453      | chr15 | 30.14       | 10.110      | 6222      | 0.0076      |
| NA21718      | NA21390      | chr17 | 34.08       | 22.170      | 9555      | 0.0081      |
| NA21488      | NA21386      | chr19 | 31.86       | 18.820      | 6990      | 0.0096      |
| NA21529      | NA21717      | chr19 | 32.72       | 15.290      | 5865      | 0.0074      |

Table  $S_3$ . Pairs with  $\geq 16$  segments of size  $\geq 2$  cM

| Individual 1<br>ID | Individual 2<br>ID | No.<br>Seg. | Total (Mean)<br>Length(cM) | Genetic<br>Length(cM) | Number of<br>SNPs | Physical<br>Length(Mb) | $\hat{\pi}$ |
|--------------------|--------------------|-------------|----------------------------|-----------------------|-------------------|------------------------|-------------|
| NA21300            | NA21741            | 16          | 85.32(5.33)                | 2.33–21.78            | 1.331–7.531       | 559–3915               | 0.0092      |
| NA21320            | NA21368            | 18          | 78.21(4.35)                | 2.28–8.76             | 0.990–7.739       | 554–2676               | 0.0083      |
| NA21648            | NA21448            | 17          | 99.51(5.85)                | 2.01–13.39            | 0.728–9.627       | 308–4190               | 0.0092      |
| NA21361            | NA21311            | 16          | 62.66(3.92)                | 2.00–8.28             | 1.047–28.48       | 528–3353               | 0.0098      |
| NA21514            | NA21825            | 17          | 94.20(5.54)                | 2.02–13.82            | 0.908–10.95       | 308–4377               | 0.0093      |
| NA21366            | NA21513            | 16          | 87.10(5.44)                | 2.02–16.56            | 1.153–9.469       | 380–4182               | 0.0099      |
| NA21344            | NA21615            | 16          | 78.43(4.90)                | 2.13–11.15            | 0.877–14.37       | 478–4972               | 0.0096      |
| NA21365            | NA21599            | 17          | 86.64(5.10)                | 2.11–14.29            | 1.079–8.224       | 698–4693               | 0.0093      |
| NA21363            | NA21312            | 16          | 69.08(4.32)                | 2.06–7.27             | 0.648–6.841       | 342–2774               | 0.0091      |
| NA21631            | NA21510            | 17          | 82.78(4.87)                | 2.24–11.17            | 0.629–13.53       | 457–5360               | 0.0096      |
| NA21485            | NA21313            | 16          | 68.29(4.27)                | 2.13–9.30             | 0.711–8.313       | 517–3584               | 0.0099      |
| NA21457            | NA21523            | 16          | 88.22(5.51)                | 2.05–18.50            | 0.750–10.74       | 470–6437               | 0.0098      |
| NA21370            | NA21718            | 16          | 107.85(6.74)               | 2.08–16.84            | 0.596–16.36       | 357–6924               | 0.0098      |
| NA21370            | NA21693            | 16          | 99.38(6.21)                | 2.04–17.43            | 0.886–31.77       | 580–5986               | 0.0095      |
| NA21370            | NA21442            | 16          | 71.56(4.47)                | 2.33–9.34             | 0.890–6.254       | 274–3229               | 0.0099      |
| NA21475            | NA21313            | 16          | 106.62(6.66)               | 2.25–14.83            | 1.011–10.99       | 626–5293               | 0.0097      |
| NA21304            | NA21301            | 16          | 102.03(6.38)               | 2.13–22.93            | 0.808–23.75       | 389–7626               | 0.0092      |
| NA21584            | NA21608            | 18          | 61.10(3.40)                | 2.17–6.18             | 0.875–6.698       | 419–2617               | 0.0087      |
| NA21584            | NA21519            | 21          | 76.36(3.64)                | 2.01–8.55             | 0.439–4.465       | 163–1659               | 0.0075      |
| NA21584            | NA21317            | 18          | 73.08(4.06)                | 2.01–13.14            | 0.699–5.39        | 254–2608               | 0.0097      |
| NA21584            | NA21309            | 17          | 68.14(4.01)                | 2.05–7.18             | 0.514–5.703       | 369–2472               | 0.0085      |

Table  $S_4$ . Individuals with autozygous segments  $\geq 10$  cM

| Individual ID | Chr   | Genetic Length(cM) | Number of SNPs | Physical Length (Mb) | Inbreeding Coefficient |
|---------------|-------|--------------------|----------------|----------------------|------------------------|
| NA21615       | chr1  | 16.00              | 5749           | 12.330               | 0.005                  |
| NA21423       | chr3  | 10.01              | 4515           | 9.983                | 0.006                  |
| NA21333       | chr3  | 38.61              | 17759          | 50.830               | 0.023                  |
| NA21311       | chr6  | 23.72              | 10330          | 24.440               | 0.008                  |
| NA21370       | chr7  | 25.40              | 11962          | 32.530               | 0.013                  |
| NA21436       | chr8  | 16.54              | 7112           | 16.720               | 0.017                  |
| NA21489       | chr14 | 11.45              | 2236           | 7.326                | 0.004                  |
| NA21425       | chr16 | 10.70              | 4907           | 12.710               | 0.011                  |
| NA21436       | chr17 | 32.10              | 6144           | 13.010               | 0.017                  |
| NA21333       | chr18 | 11.46              | 6481           | 14.520               | 0.023                  |

Table  $S_5$ . Individuals with  $\geq 3$  autozygous segments of length  $\geq 2$  cM

| Individual ID | Number of Segments | Total (Average) Length(cM) | Genetic Length(cM) | Number of SNPs | Physical Length(Mb) | Inbreeding Coefficient |
|---------------|--------------------|----------------------------|--------------------|----------------|---------------------|------------------------|
| NA21634       | 3                  | 15.378(5.126)              | 2.466–8.701        | 1.598–18.85    | 1149–5594           | 0.006                  |
| NA21513       | 3                  | 8.409(2.803)               | 2.196–3.444        | 1.204–3.778    | 613–1626            | 0.005                  |
| NA21357       | 3                  | 9.945(3.315)               | 2.856–3.58         | 0.9669–1.587   | 677–1059            | 0.002                  |
| NA21405       | 3                  | 9.202(3.067)               | 2.678–3.382        | 1.201–2.63     | 772–1445            | 0.004                  |
| NA21401       | 3                  | 16.348(5.449)              | 4.524–7.042        | 2.786–5.046    | 1167–2026           | 0.005                  |
| NA21723       | 3                  | 7.082(2.361)               | 2.208–2.516        | 1.179–3.021    | 512–1288            | 0.003                  |
| NA21489       | 3                  | 18.932(6.311)              | 3.246–11.449       | 1.619–7.326    | 869–2236            | 0.004                  |
| NA21303       | 3                  | 7.267(2.422)               | 2.174–2.839        | 0.5251–2.28    | 386–983             | 0.005                  |
| NA21399       | 3                  | 9.610(3.203)               | 2.681–3.63         | 1.572–2.629    | 933–1443            | 0.004                  |
| NA21388       | 3                  | 8.595(2.865)               | 2.227–3.299        | 1.56–3.92      | 465–1430            | 0.004                  |
| NA21415       | 3                  | 7.432(2.477)               | 2.056–2.725        | 0.8056–2.838   | 485–1414            | 0.004                  |
| NA21363       | 3                  | 8.075(2.692)               | 2.268–3.007        | 0.5346–1.454   | 419–747             | 0.004                  |
| NA21439       | 3                  | 7.292(2.431)               | 2.036–2.887        | 1.6–2.83       | 704–1505            | 0.005                  |
| NA21425       | 6                  | 29.077(4.846)              | 2.018–10.702       | 1.142–12.71    | 580–4907            | 0.011                  |
| NA21333       | 3                  | 58.791(19.597)             | 8.724–38.612       | 8.84–50.83     | 3790–17759          | 0.023                  |
| NA21391       | 4                  | 12.675(3.169)              | 2.054–4.186        | 0.8406–3.51    | 490–1634            | 0.003                  |
| NA21490       | 4                  | 13.387(3.347)              | 2.15–4.386         | 1.59–5.419     | 684–3884            | 0.008                  |
| NA21417       | 4                  | 12.1(3.025)                | 2.253–4.893        | 1.062–4.108    | 399–1942            | 0.004                  |
| NA21436       | 5                  | 61.415(12.283)             | 2.747–32.098       | 1.376–16.72    | 994–7112            | 0.017                  |



Table S<sub>6</sub>. The 50 loci showing the greatest excess of IBD sharing

| Chromosome | Start(bp) | End (bp)  | Size(cM) | References    | # of Genes | Candidate Genes              |
|------------|-----------|-----------|----------|---------------|------------|------------------------------|
| 1          | 39324208  | 39704126  | 0.036    | -             | 13         | RRAGC, GJA9, MACF1           |
| 1          | 49064047  | 50364152  | 0.077    | 5, 7          | 8          | ELAVL4, DMRTA2               |
| 1          | 50641271  | 51214549  | 0.044    | 5, 7          | 11         | EPS15, CDKN2C, DMRTA2        |
| 1          | 75963278  | 76233802  | 0.041    | 1, 7          | 8          | ACADM, RABGGTB, MSH4         |
| 1          | 113877319 | 114222836 | 0.021    | -             | 3          | PHTF1, RSNB1, C1orf178       |
| 1          | 160004862 | 160164421 | 0.014    | -             | 8          | KCNJ10, ATP1A2, CASQ1        |
| 1          | 167360386 | 167703170 | 0.049    | 4, 5          | 9          | NME7, BLZF1, C1orf114        |
| 1          | 171808391 | 173261413 | 0.068    | 7             | 22         | GPR52, TNFR                  |
| 1          | 189062244 | 189329011 | 0.048    | -             | 1          | RGS1                         |
| 1          | 225240160 | 225664792 | 0.089    | 4             | 5          | CDC42BPA                     |
| 2          | 134735206 | 136759336 | 1.383    | 1, 2, 4, 7    | 27         | LCT, ZRANB3, R3HDM1          |
| 2          | 136771874 | 137484018 | 0.577    | 1, 7, 9       | 9          | CXR4                         |
| 3          | 50399186  | 51743949  | 0.067    | 1             | 20         | C3orf18, HEMK1, CISH         |
| 6          | 26252770  | 26855017  | 0.266    | 1, 6, 8       | 29         | BTN2A3                       |
| 6          | 27796348  | 31041773  | 1.139    | 1, 5, 6, 7, 9 | 213        | HLA-Class I                  |
| 6          | 31189817  | 31536148  | 0.419    | -             | 33         | HLA-Class I                  |
| 6          | 31593333  | 31787286  | 0.135    | -             | 31         | LSM2, MSH5, DDAH2            |
| 6          | 32317005  | 32819554  | 0.361    | -             | 26         | HLA-Class II                 |
| 6          | 33190718  | 33235735  | 0.058    | -             | 3          | HLA-Class II                 |
| 6          | 44790294  | 45463587  | 0.065    | -             | 6          | SUPT3H                       |
| 6          | 54532896  | 54575592  | 0.052    | -             | 0          | -                            |
| 6          | 57436566  | 63102769  | 0.309    | -             | 20         | GUSBL2, LOC727798, KHDRBS2   |
| 6          | 76986401  | 77315837  | 0.050    | -             | 3          | U6, RP11-35J1.1              |
| 6          | 86546633  | 86595437  | 0.002    | -             | 1          | RP11-207F8.1                 |
| 6          | 87931591  | 88103096  | 0.013    | 7             | 6          | ZNF292, GJB7, C6orf162       |
| 6          | 109758929 | 110203589 | 0.064    | -             | 10         | FLJ25791, FLJ42177, C6orf199 |
| 6          | 115691168 | 116073998 | 0.050    | -             | 1          | RP11-282C5.1                 |
| 6          | 119676688 | 119793015 | 0.022    | -             | 0          | -                            |
| 6          | 130553253 | 130813845 | 0.106    | 1, 4          | 2          | KIAA1913, SAMD3              |
| 6          | 131177407 | 131413441 | 0.061    | -             | 2          | DKFZP781H1755, EPB41L2       |
| 6          | 145885559 | 146412767 | 0.044    | -             | 5          | EPM2A, FBXO30, LOC729411     |
| 6          | 162953482 | 163042726 | 0.010    | -             | 2          | PARK2                        |
| 6          | 169637185 | 169864628 | 0.045    | -             | 6          | DKFZP686G02190, THBS2, WDR27 |
| 8          | 99536382  | 100917656 | 0.085    | 5             | 26         | COH1, VPS13B, COX6C          |
| 9          | 11364073  | 11609839  | 0.075    | -             | 0          | -                            |
| 9          | 93979436  | 94620197  | 0.105    | -             | 5          | LOC375748, C9orf102, ZNF367  |
| 11         | 48011370  | 56273685  | 0.344    | 1, 3, 6, 8    | 182        | OR5T1, OR5W1P, OR8H3         |
| 12         | 21295588  | 21380972  | 0.039    | -             | 2          | SLCO1B1                      |
| 12         | 37003945  | 37274117  | 0.029    | 7             | 1          | CPNE8                        |
| 12         | 110346958 | 111509176 | 0.064    | 1, 5, 9       | 29         | FLJ34154, SCA2, ALDH2        |
| 14         | 65695432  | 66942881  | 0.097    | 1, 5, 7       | 17         | PLEK2, ATP6V1D, EIF2S1       |
| 15         | 74264378  | 75049544  | 0.070    | 1             | 20         | LOC388139, ZNF291, RCN2      |
| 16         | 34782230  | 46539787  | 0.157    | 3, 6          | 30         | LOC91807, LOC388272, PHKB    |
| 16         | 65806332  | 66247253  | 0.063    | 3, 6          | 1          | FLJ40162, FLJ11004           |
| 17         | 36539706  | 36869020  | 0.073    | -             | 6          | MRPL45                       |
| 17         | 43451275  | 43891457  | 0.045    | -             | 11         | GFAP, LOC146909, NMT1        |
| 17         | 48154902  | 48300753  | 0.039    | -             | 12         | SLC35B1                      |
| 19         | 15642246  | 15770516  | 0.051    | -             | 5          | OR10H2, OR10H3, LOC388514    |
| 19         | 23571954  | 23901490  | 0.028    | -             | 4          | ZNF681, LOC388524, LOC390909 |
| 19         | 42362309  | 43166926  | 0.132    | 1, 7          | 30         | ZNF571, FLJ37549, LOC401915  |

## References

- [1] Voight, B. F., Kudravalli, S., Wen, X., and Pritchard, J. K. (2006). A map of recent positive selection in the human genome. *PLoS Biol* *4*, e72.
- [2] Sabeti, P. C., Varilly, P., Fry, B., Lohmueller, J., Hostetter, E., Cotsapas, C., Xie, X., Byrne, E. H., McCarroll, S. A., Gaudet, R., et al. (2007). Genome-wide detection and characterization of positive selection in human populations. *Nature* *449*, 913–918.
- [3] Carlson, C. S., Thomas, D. J., Eberle, M. A., Swanson, J. E., Livingston, R. J., Rieder, M. J., and Nickerson, D. A. (2005). Genomic regions exhibiting positive selection identified from dense genotype data. *Genome Res* *15*, 1553–1565.
- [4] Grossman, S. R., Shylakhter, I., Karlsson, E. K., Byrne, E. H., Morales, S., Frieden, G., Hostetter, E., Angelino, E., Garber, M., Zuk, O., et al. (2010). A composite of multiple signals distinguishes causal variants in regions of positive selection. *Science* *327*, 883–886.
- [5] Kimura, R., Fujimoto, A., Tokunaga, K., and Ohashi, J. (2007). A practical genome scan for population-specific strong selective sweeps that have reached fixation. *PLoS One* *2*, e286.
- [6] Kelley, J. L., Madeoy, J., Calhoun, J. C., Swanson, W., and Akey, J. M. (2006). Genomic signatures of positive selection in humans and the limits of outlier approaches. *Genome Res* *16*, 980–989.
- [7] Tang, K., Thornton, K. R., and Stoneking, M. (2007). A new approach for using genome scans to detect recent positive selection in the human genome. *PLoS Biol* *5*, e171.
- [8] Williamson, S. H., Hubisz, M. J., Clark, A. G., Payseur, B. A., Bustamante, C. D., and Nielsen, R. (2007). Localizing recent adaptive evolution in the human genome. *PLoS Genet* *3*, e90.
- [9] Sabeti, P. C., Schaffner, S. F., Fry, B., Lohmueller, J., Varilly, P., Shamovsky, O., Palma, A., Mikkelsen, T. S., Altshuler, D., and Lander, E. S. (2006). Positive natural selection in the human lineage. *Science* *312*, 1614–1620.
